# Supplementary material for: The Hitchhiker’s guide to the pick-up locations
Source: Springer Nature journal article supplement (doi:10.1186/s40965-016-0012-1), 2016-12-01

## Additional file 1 Histograms for the closest facilities:

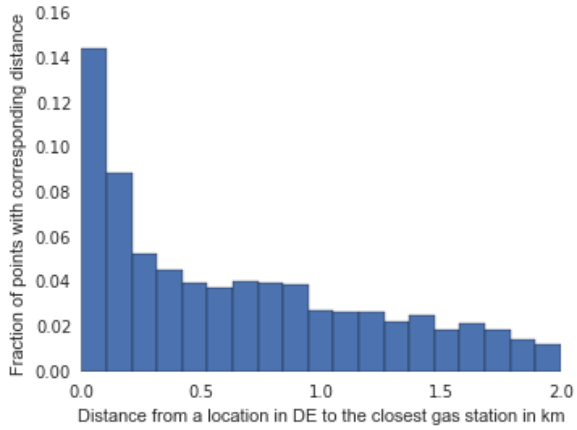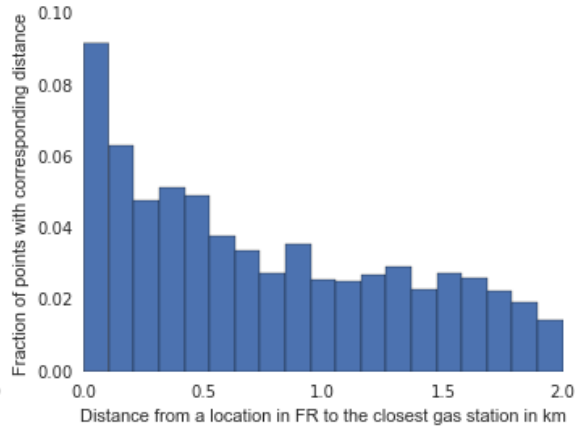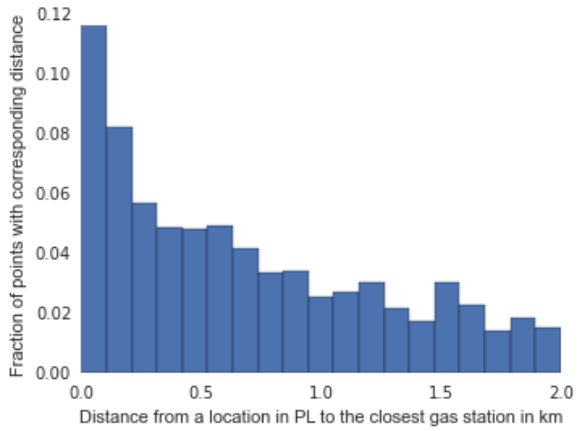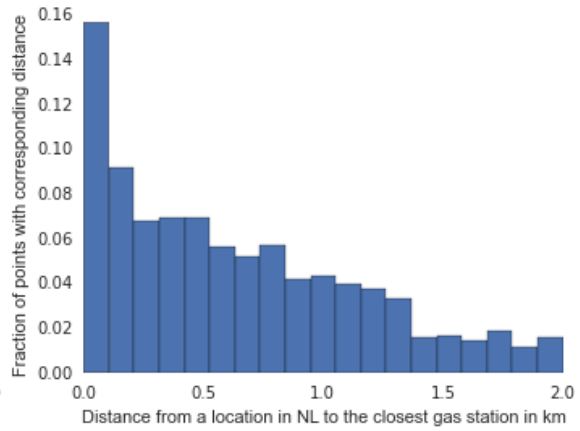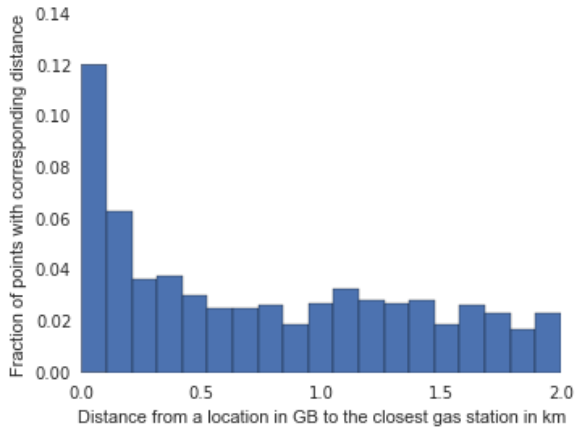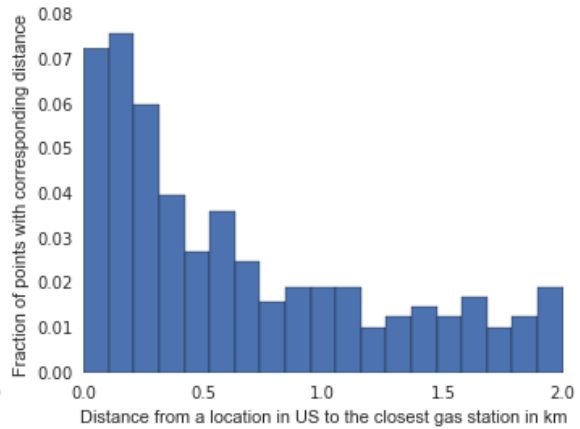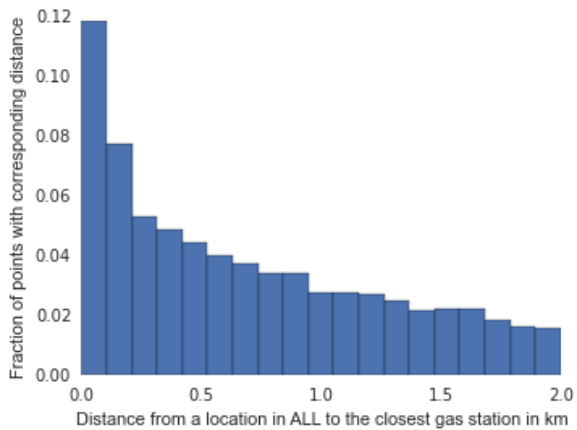

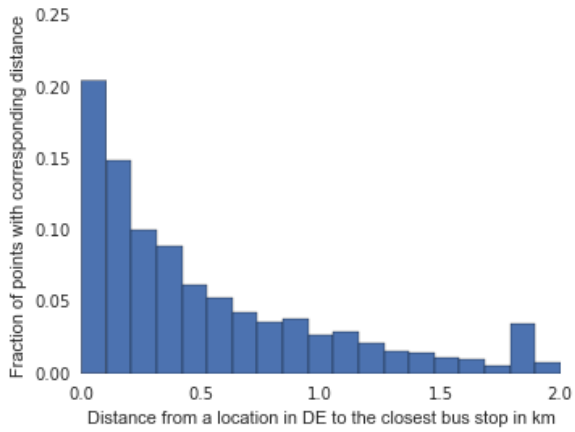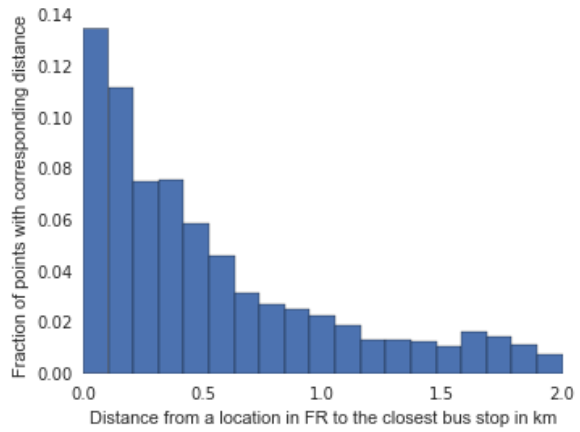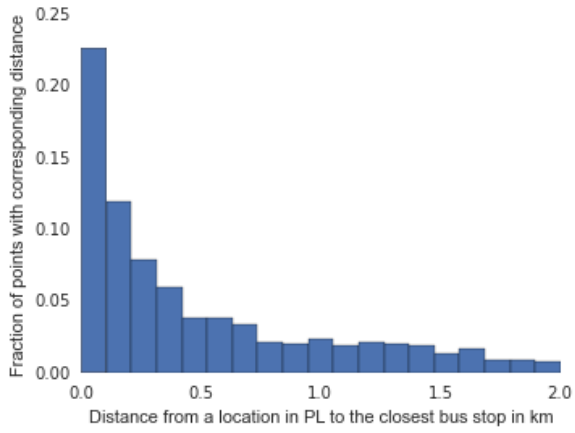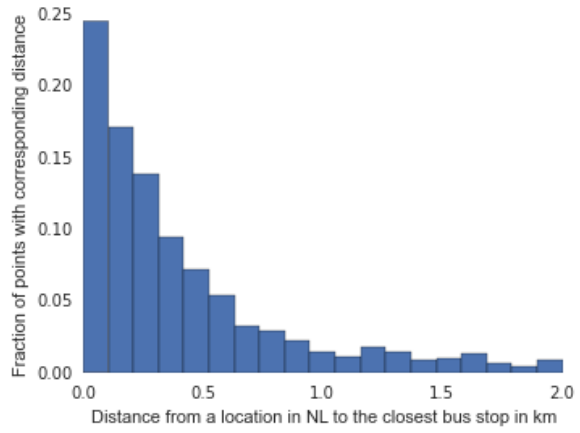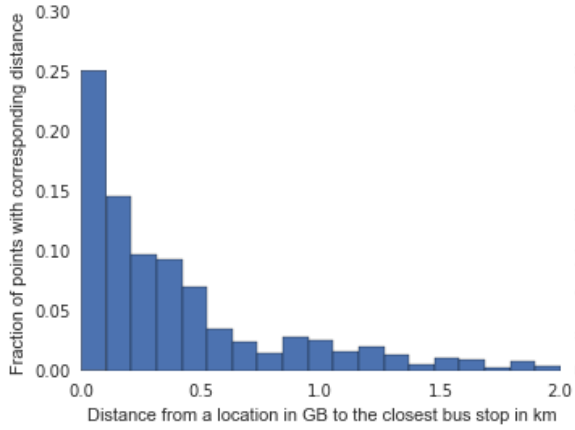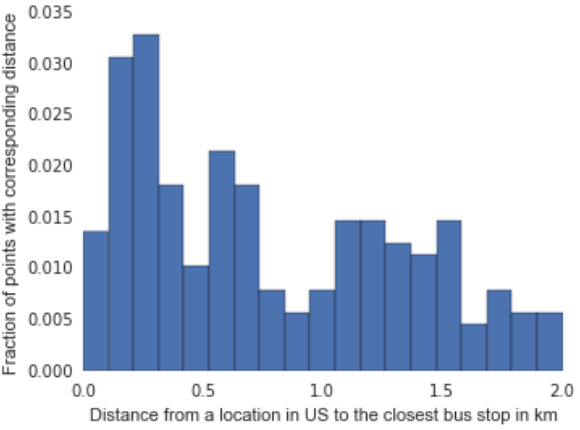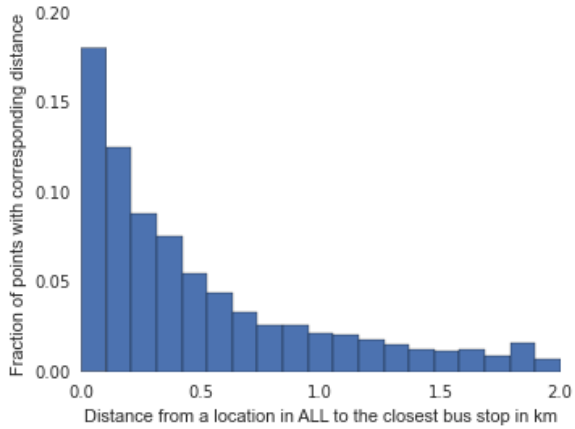

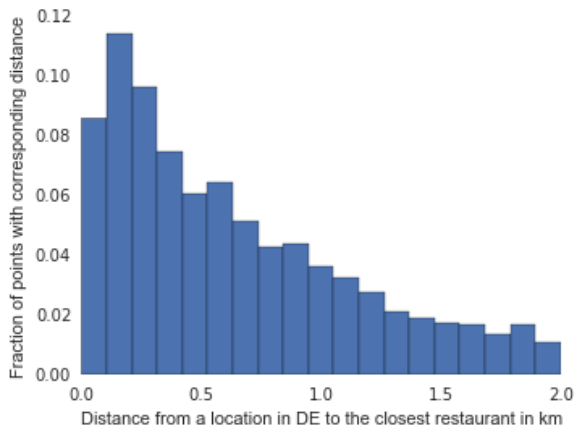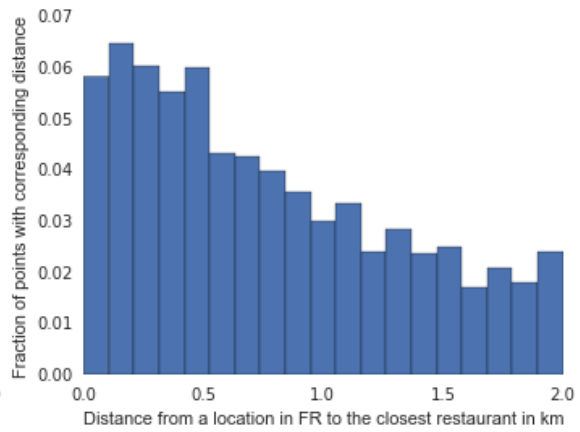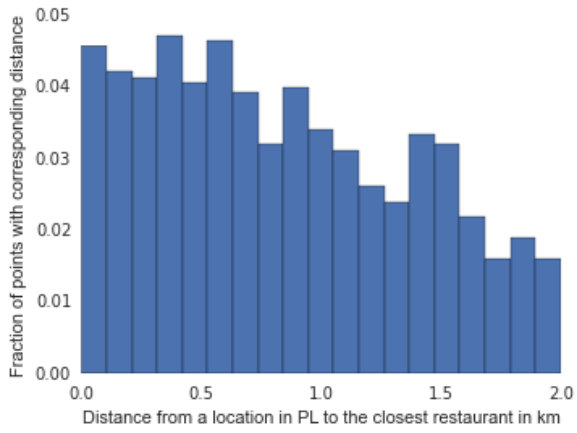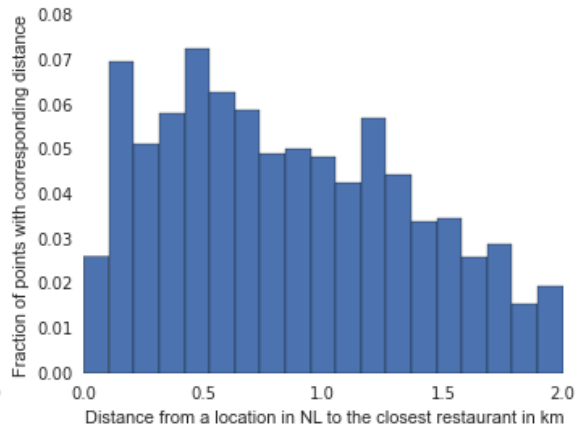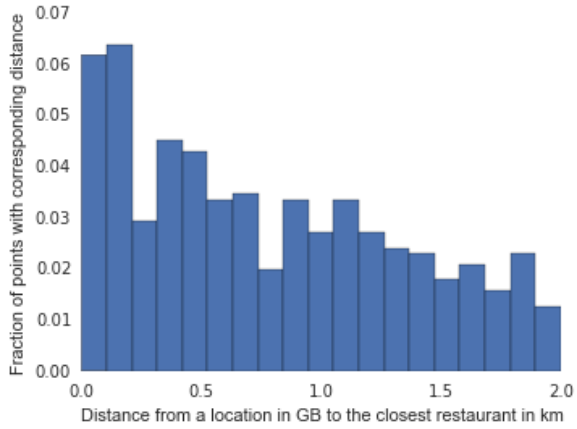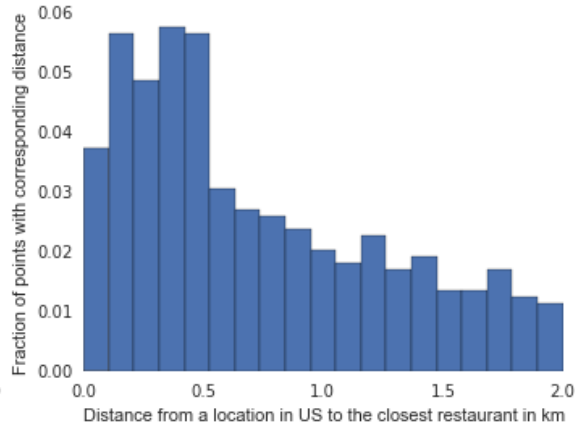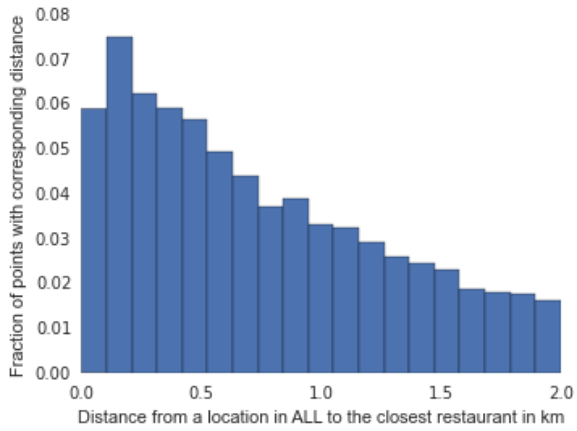

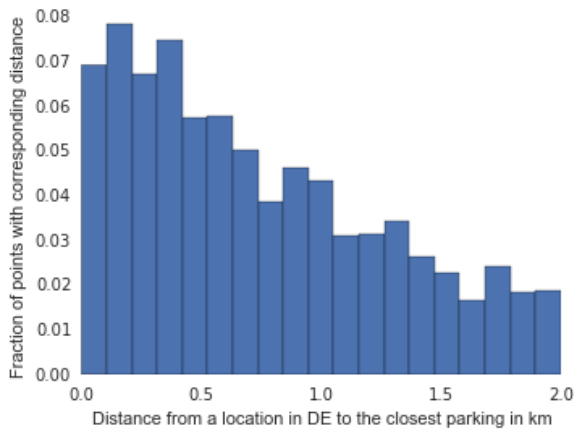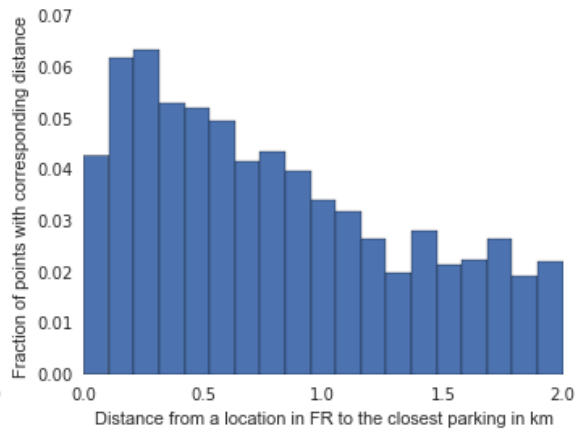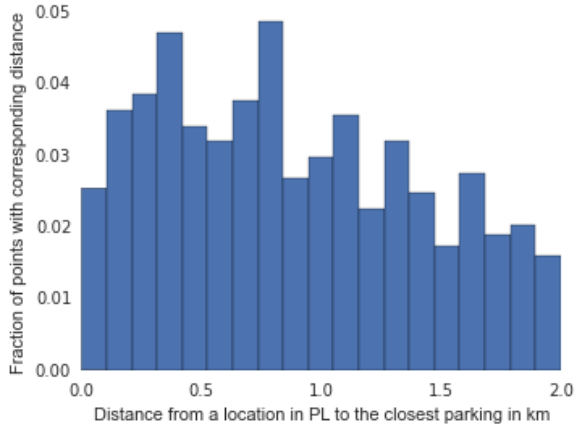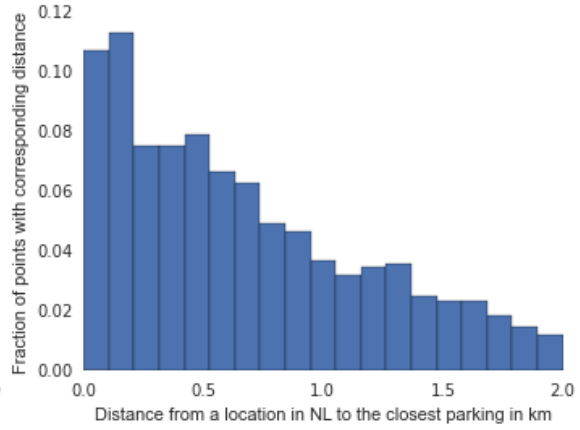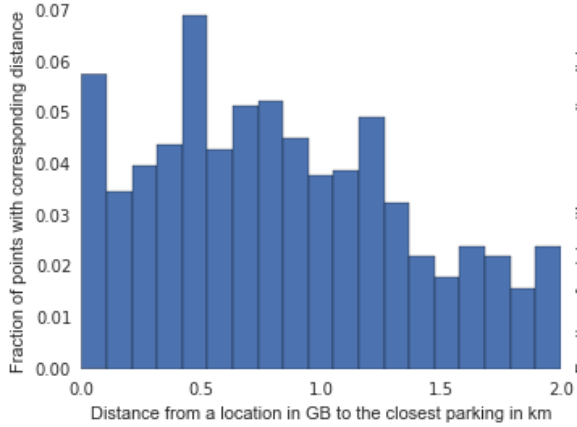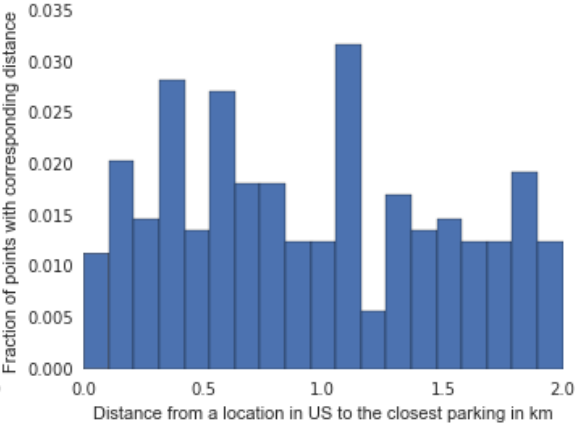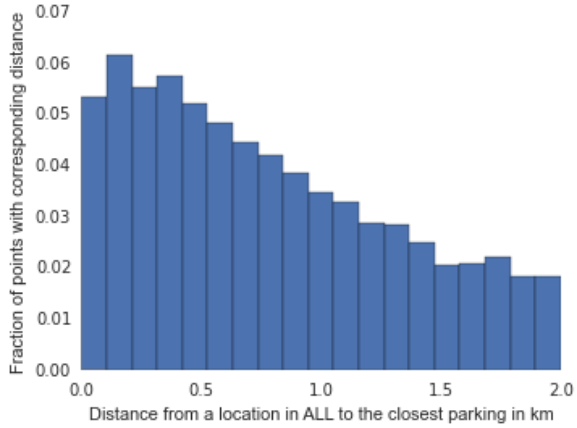

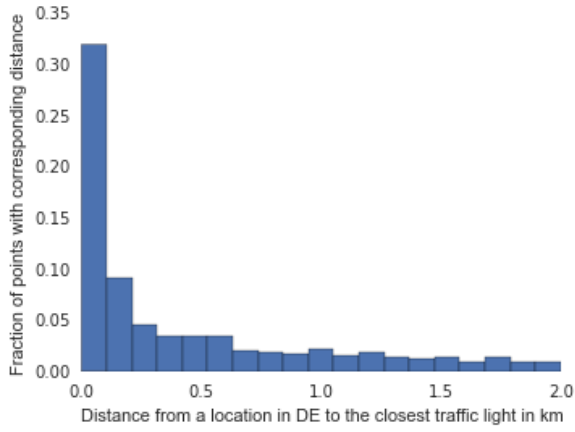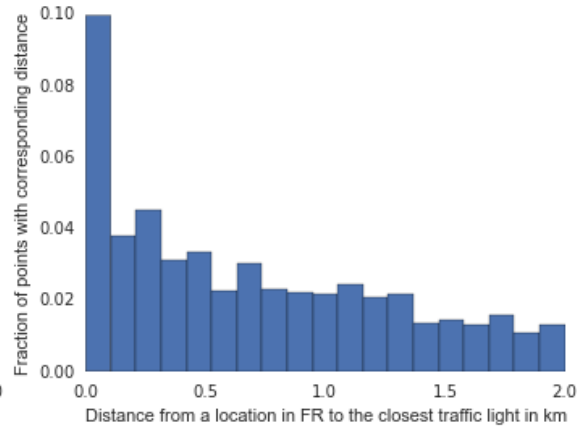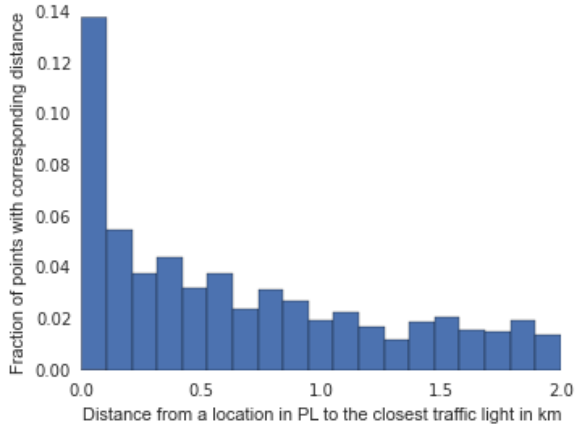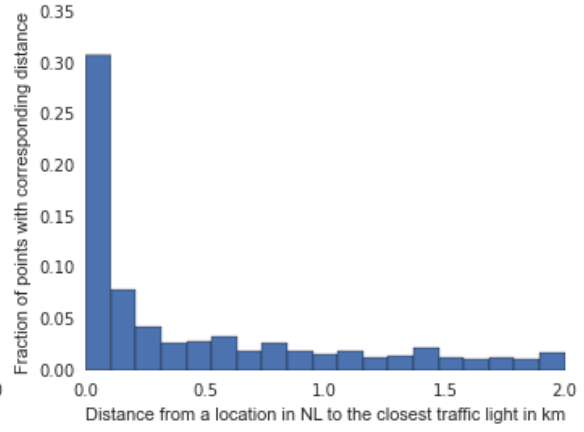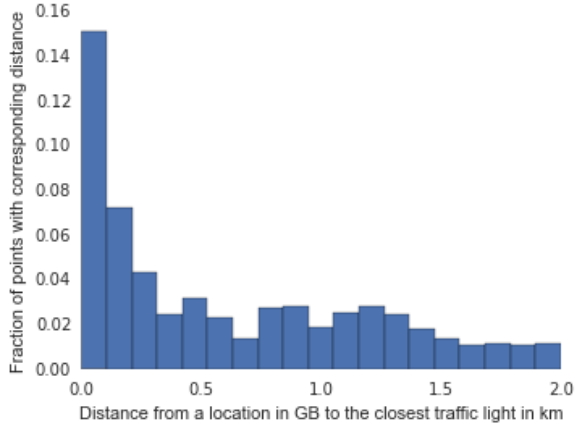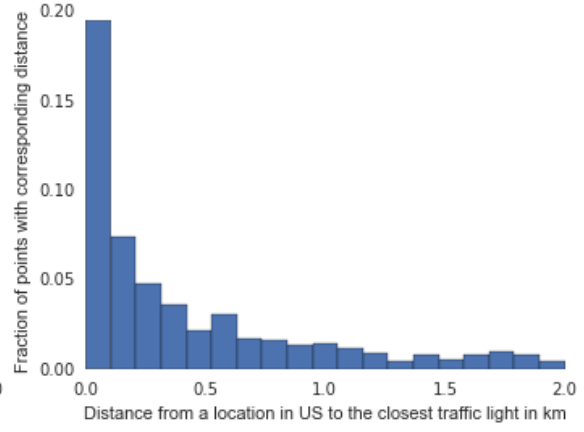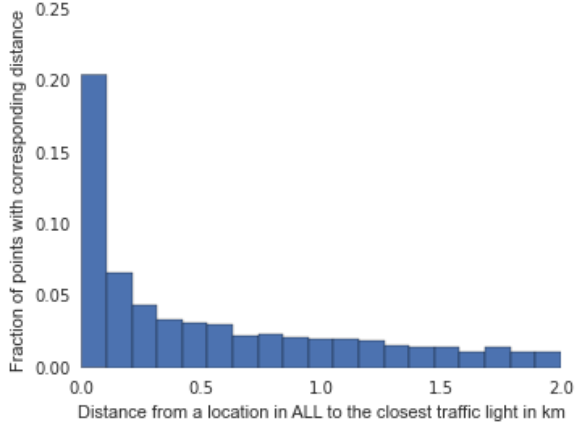

**Sentiment analysis:**



|                |                |             |         |          |           |             |             |         |  |
|----------------|----------------|-------------|---------|----------|-----------|-------------|-------------|---------|--|
|                | ramp           | gas station | highway |          |           |             |             |         |  |
| ramp           | 1              | 0.94        | 0.9     |          |           |             |             |         |  |
| gas station    | 0.94           | 1           | 0.95    |          |           |             |             |         |  |
| highway        | 0.9            | 0.95        | 1       |          |           |             |             |         |  |
|                |                |             |         |          |           |             |             |         |  |
|                |                |             |         |          |           |             |             |         |  |
| DE             |                |             |         |          |           |             |             |         |  |
|                | petrol station | A[1,2...]   | ramp    | motorway | bus stop  | gas station | highway     |         |  |
| petrol station | 1              | 0.97        | 0.88    | 0.96     | 0.68      | 0.96        | 0.96        |         |  |
| A[1,2...]      | 0.97           | 1           | 0.93    | 0.99     | 0.76      | 0.99        | 0.99        |         |  |
| ramp           | 0.88           | 0.93        | 1       | 0.93     | 0.66      | 0.9         | 0.97        |         |  |
| motorway       | 0.96           | 0.99        | 0.93    | 1        | 0.82      | 0.99        | 0.99        |         |  |
| bus stop       | 0.68           | 0.76        | 0.66    | 0.82     | 1         | 0.83        | 0.76        |         |  |
| gas station    | 0.96           | 0.99        | 0.9     | 0.99     | 0.83      | 1           | 0.98        |         |  |
| highway        | 0.96           | 0.99        | 0.97    | 0.99     | 0.76      | 0.98        | 1           |         |  |
|                |                |             |         |          |           |             |             |         |  |
|                |                |             |         |          |           |             |             |         |  |
|                |                |             |         |          |           |             |             |         |  |
| FR             |                |             |         |          |           |             |             |         |  |
|                | petrol station | A[1,2...]   | ramp    | motorway | N[1,2...] | bus stop    | gas station | highway |  |
| petrol station | 1              | 0.99        | 0.99    | 0.98     | 0.9       | 0.92        | 0.99        | 0.98    |  |
| A[1,2...]      | 0.99           | 1           | 0.99    | 0.98     | 0.91      | 0.93        | 0.99        | 1       |  |
| ramp           | 0.99           | 0.99        | 1       | 0.99     | 0.92      | 0.92        | 0.99        | 0.99    |  |
| motorway       | 0.98           | 0.98        | 0.99    | 1        | 0.95      | 0.94        | 0.97        | 0.99    |  |
| N[1,2...]      | 0.9            | 0.91        | 0.92    | 0.95     | 1         | 0.94        | 0.87        | 0.92    |  |
| bus stop       | 0.92           | 0.93        | 0.92    | 0.94     | 0.94      | 1           | 0.9         | 0.94    |  |
| gas station    | 0.99           | 0.99        | 0.99    | 0.97     | 0.87      | 0.9         | 1           | 0.99    |  |
| highway        | 0.98           | 1           | 0.99    | 0.99     | 0.92      | 0.94        | 0.99        | 1       |  |



## Correlations between waiting time and rating of locations

Correlations between waiting time and location ratings for dataset points in DE

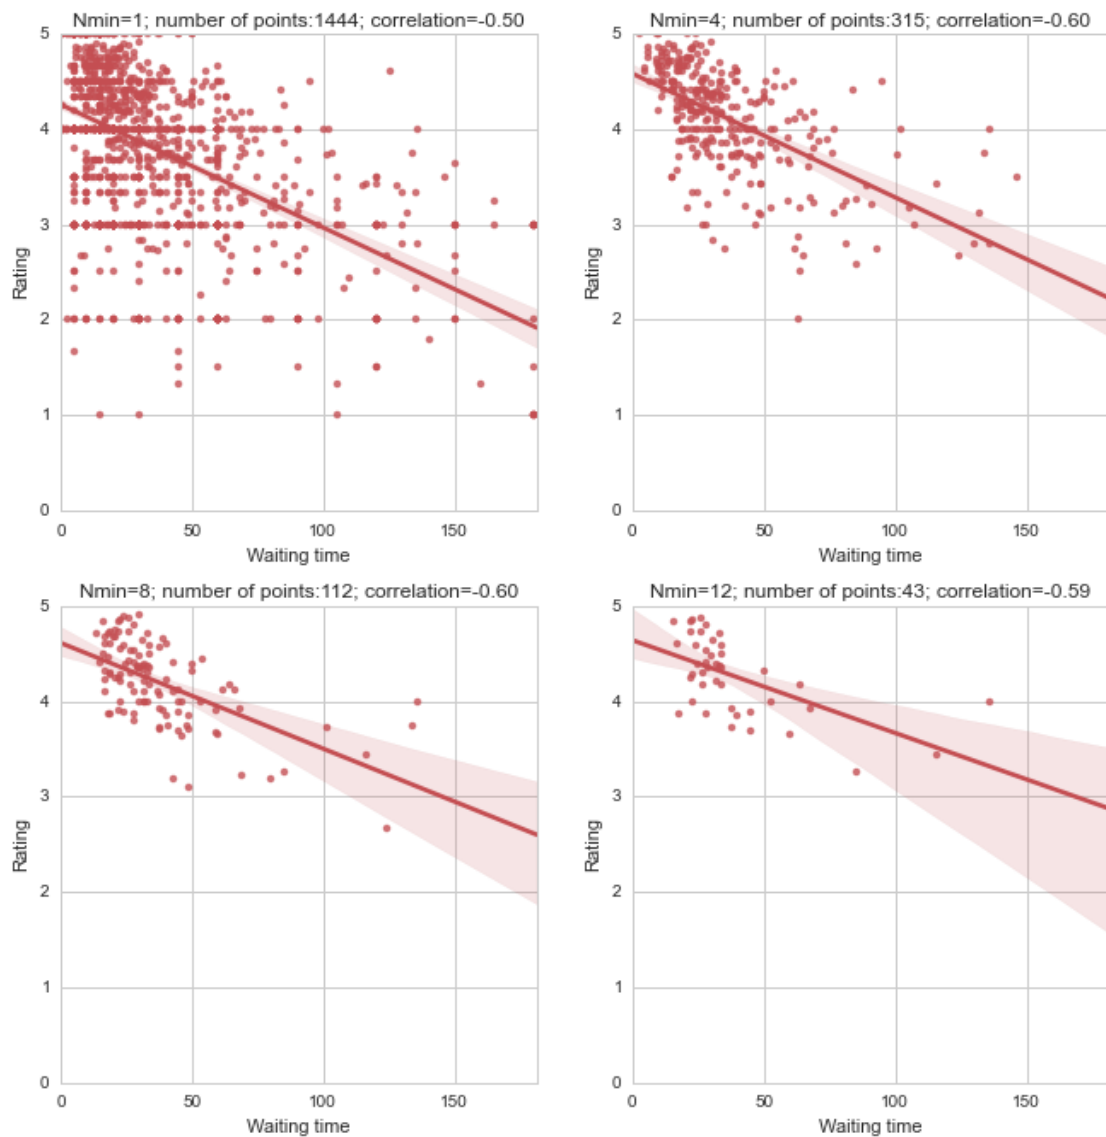

# Correlations between waiting time and location ratings for dataset points in FR

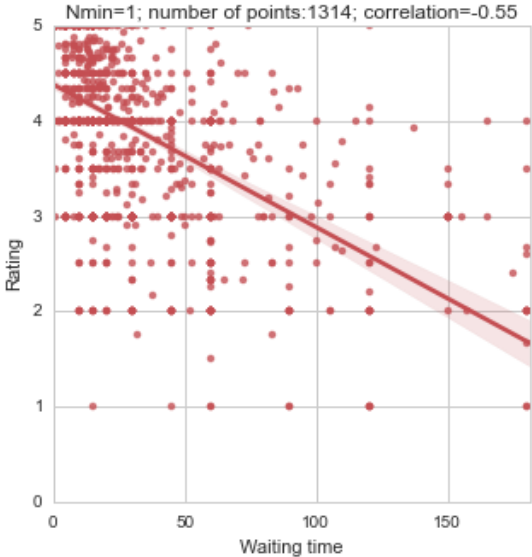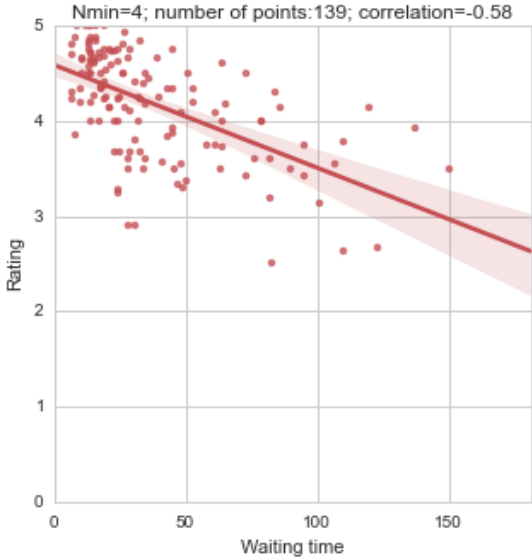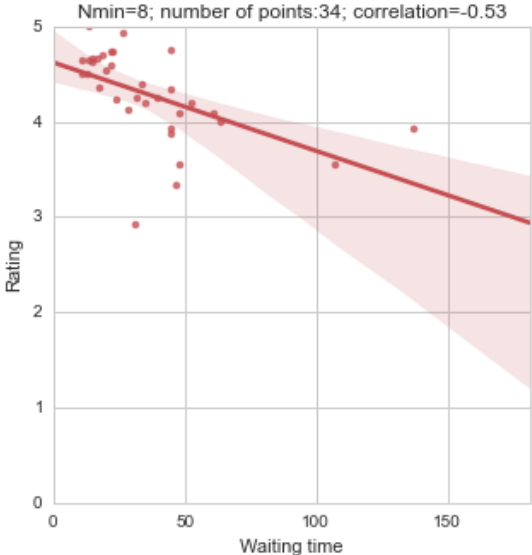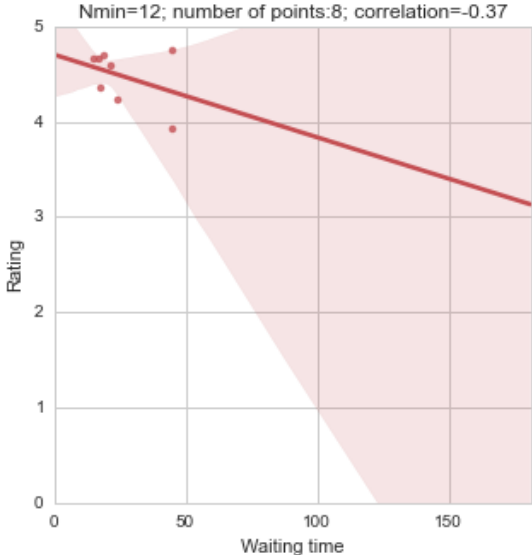

# Correlations between waiting time and location ratings for dataset points in PL

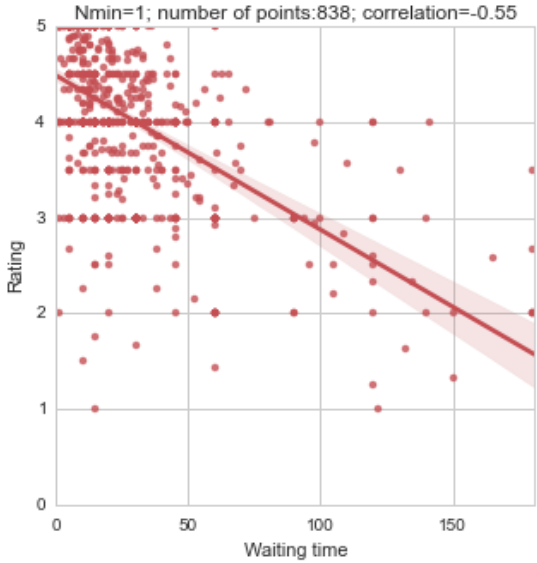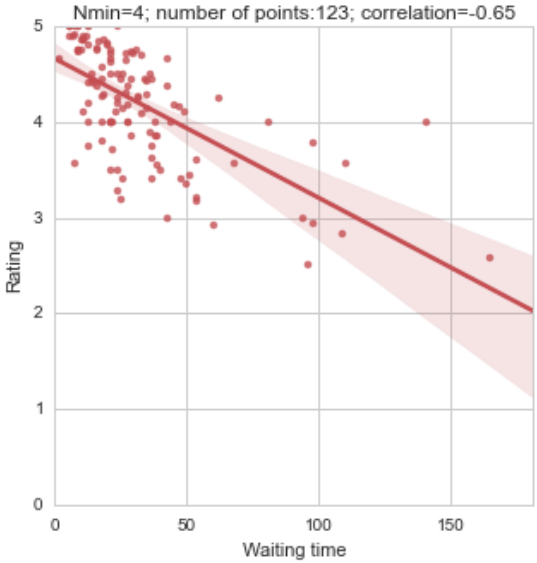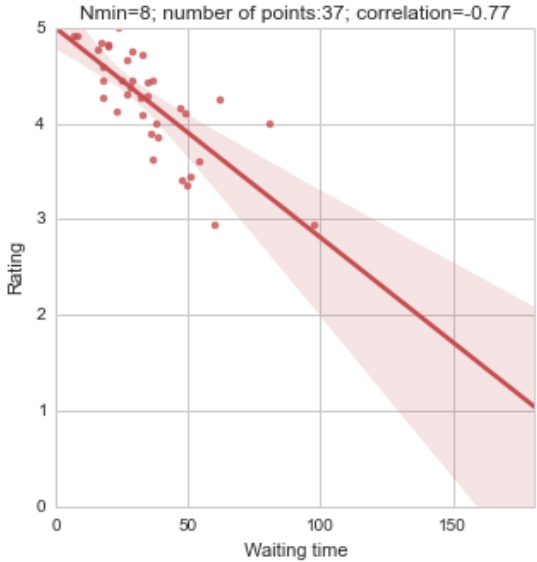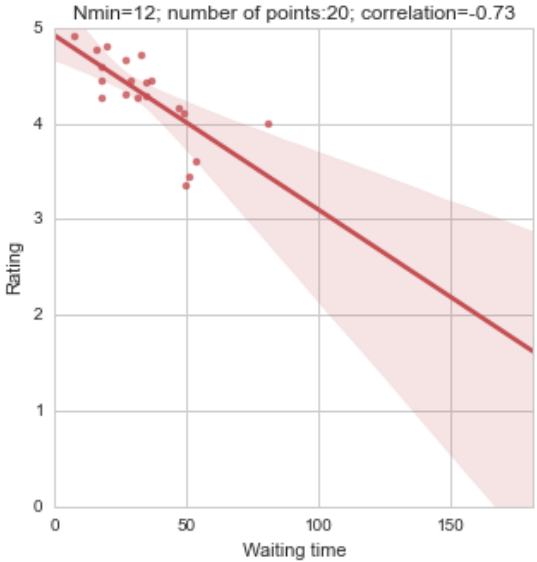

# Correlations between waiting time and location ratings for dataset points in NL

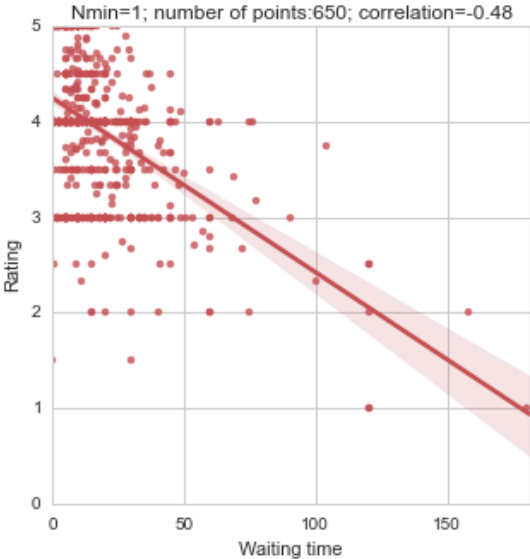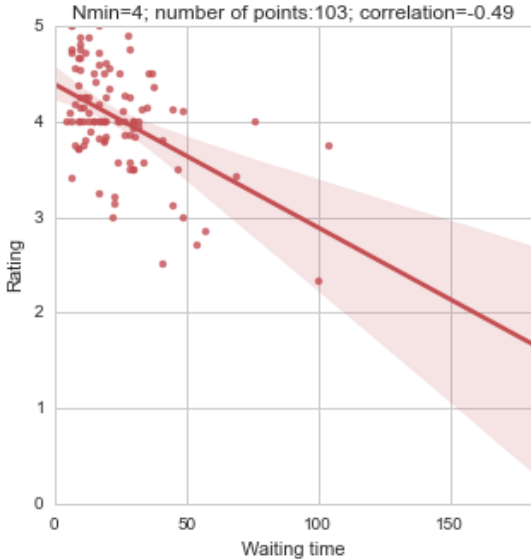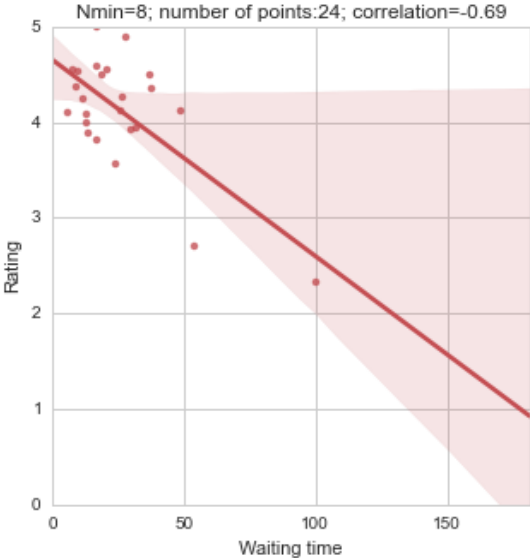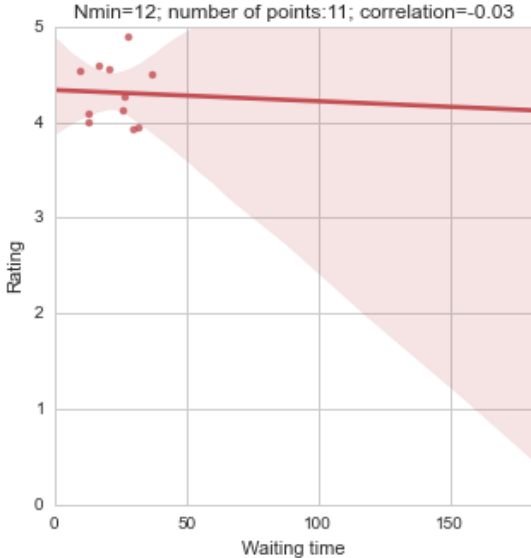

# Correlations between waiting time and location ratings for dataset points in GB

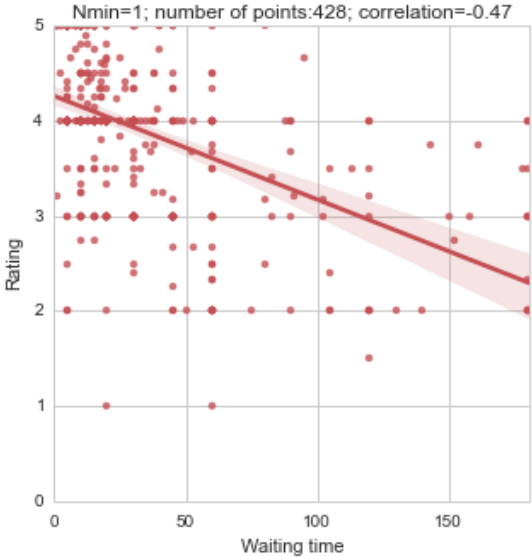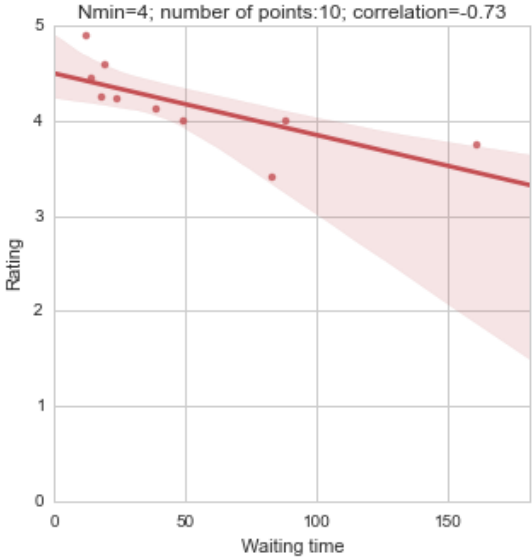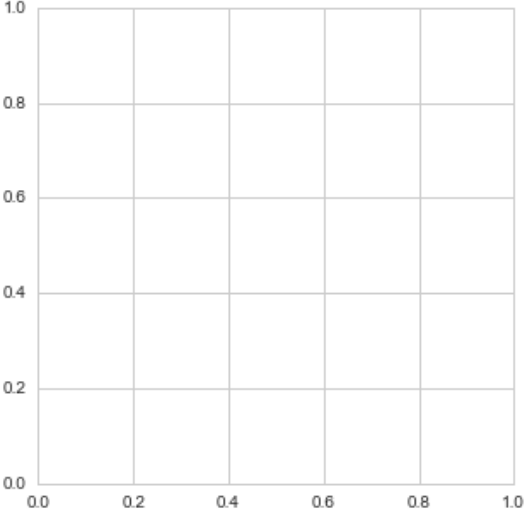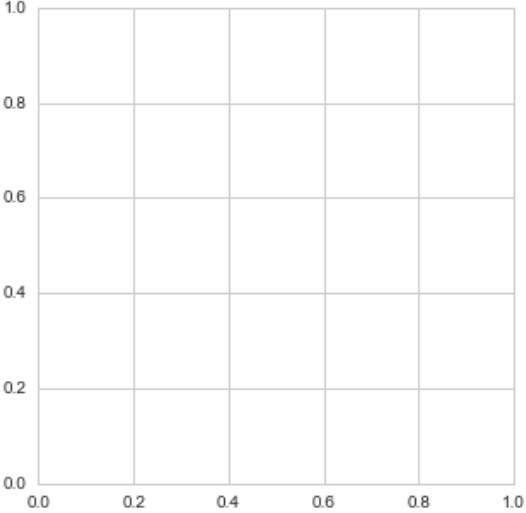

# Correlations between waiting time and location ratings for dataset points in US

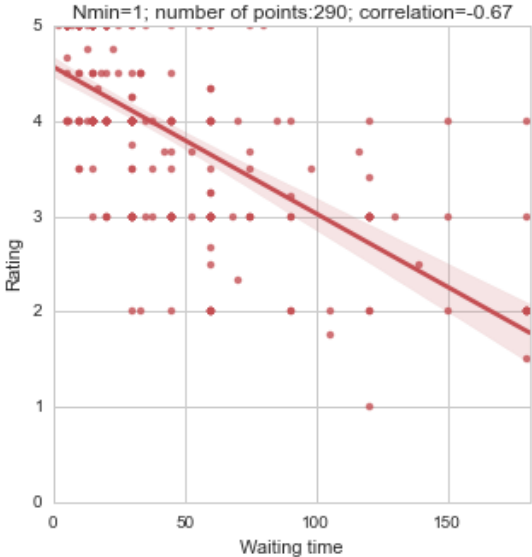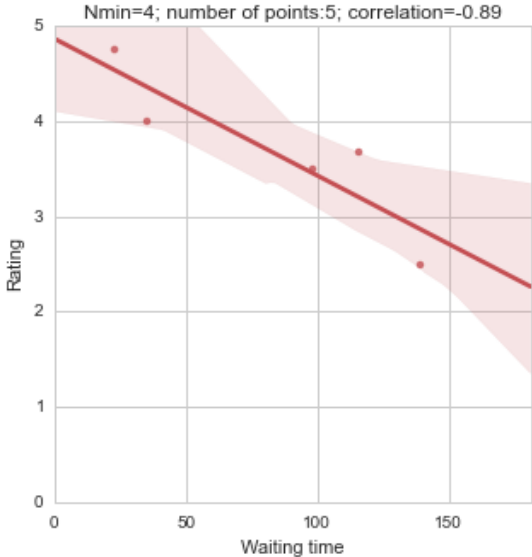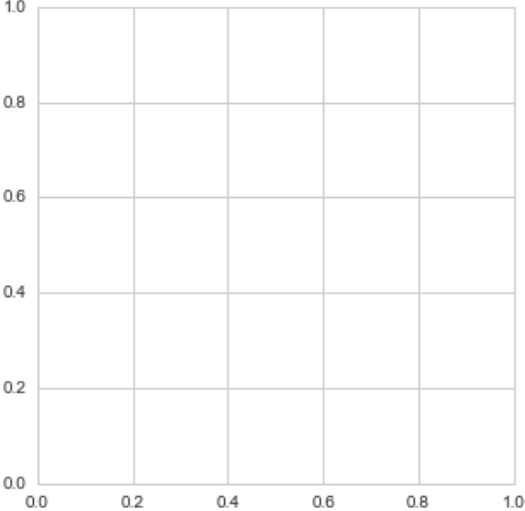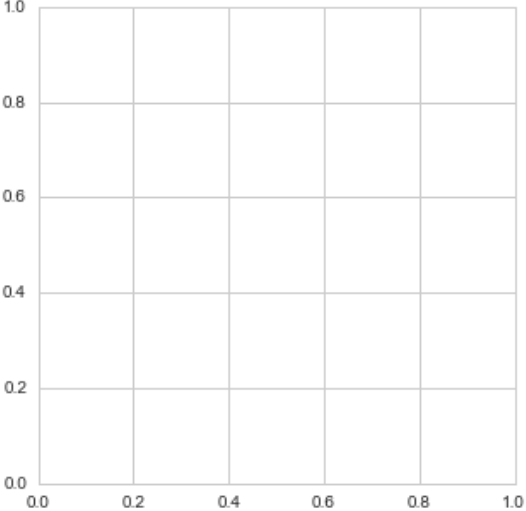

Correlations between waiting time and location ratings for dataset points in ALL

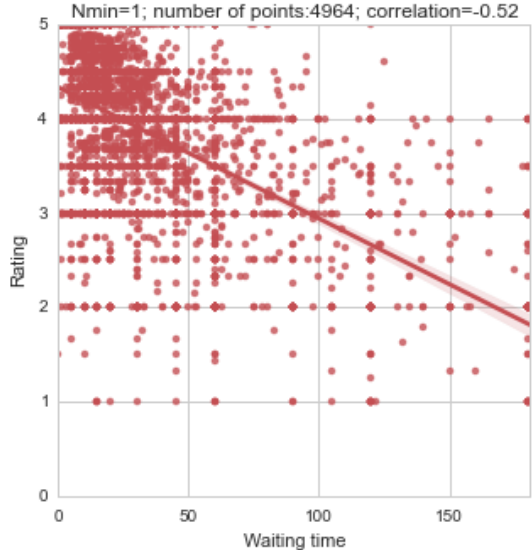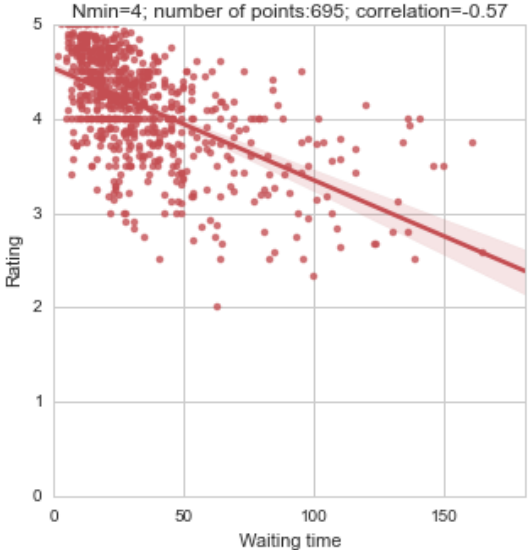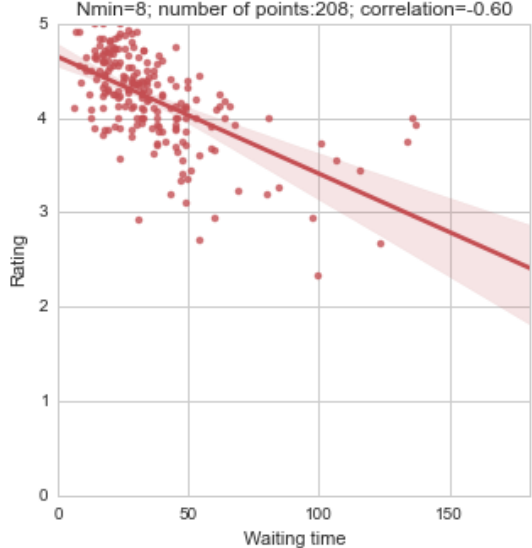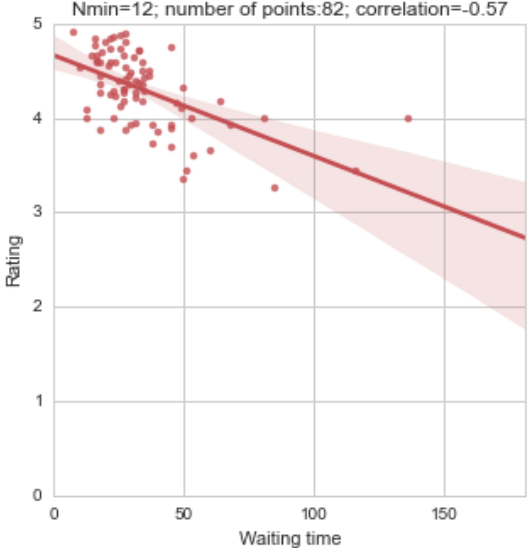

## Average rating by type of road

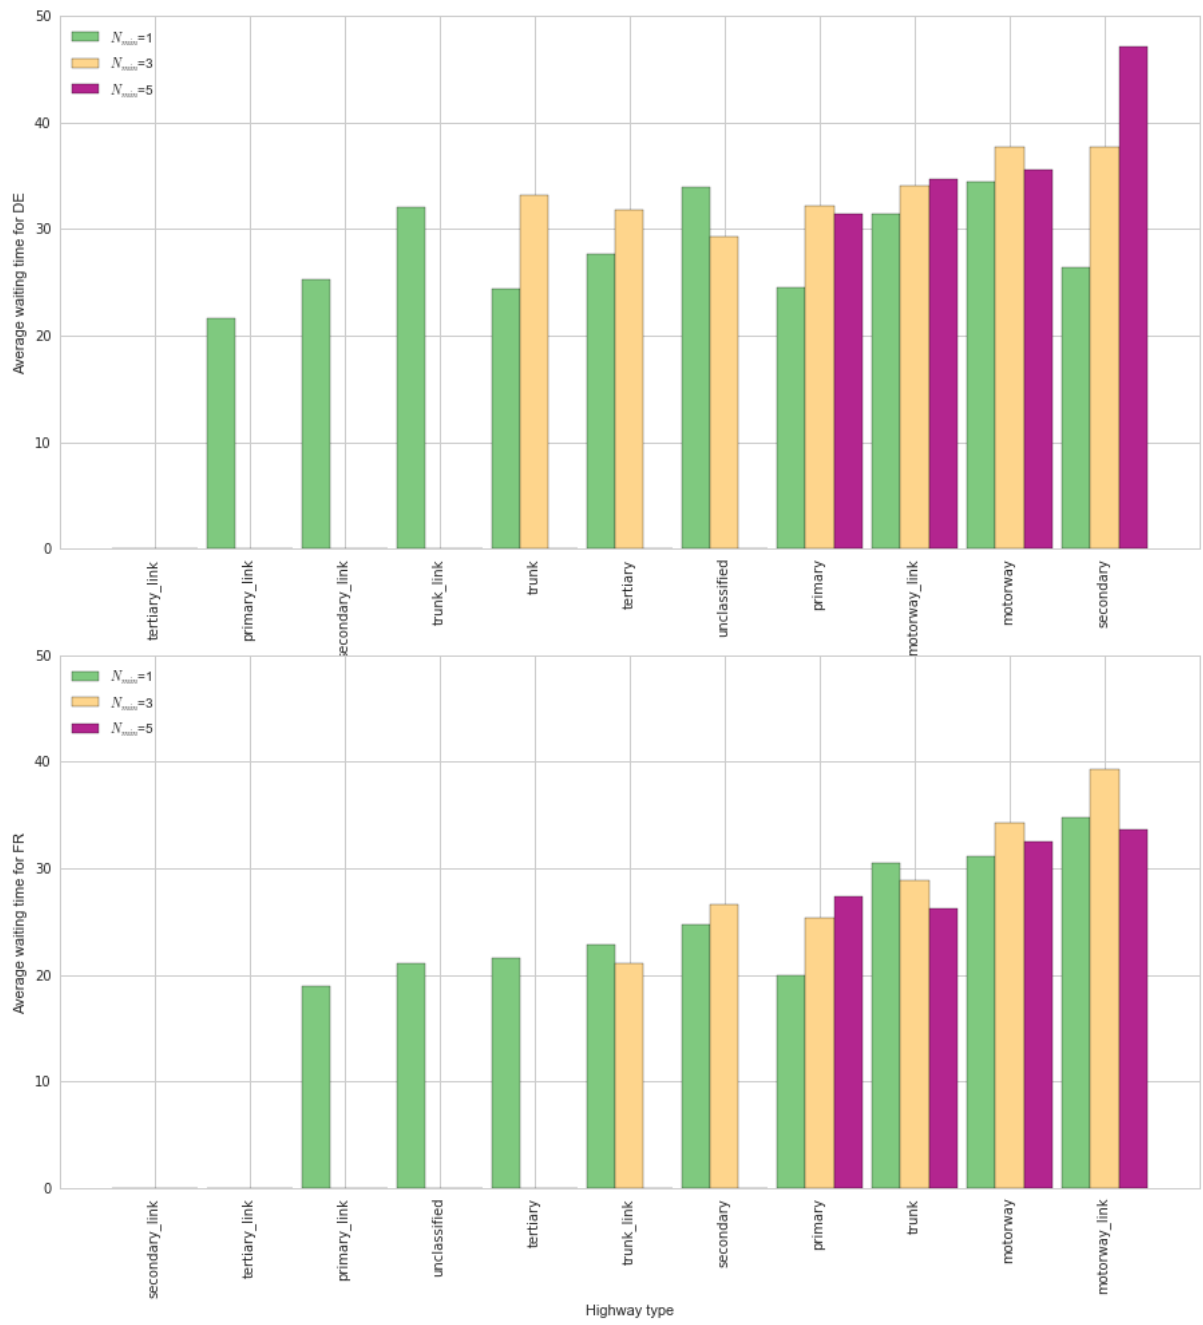



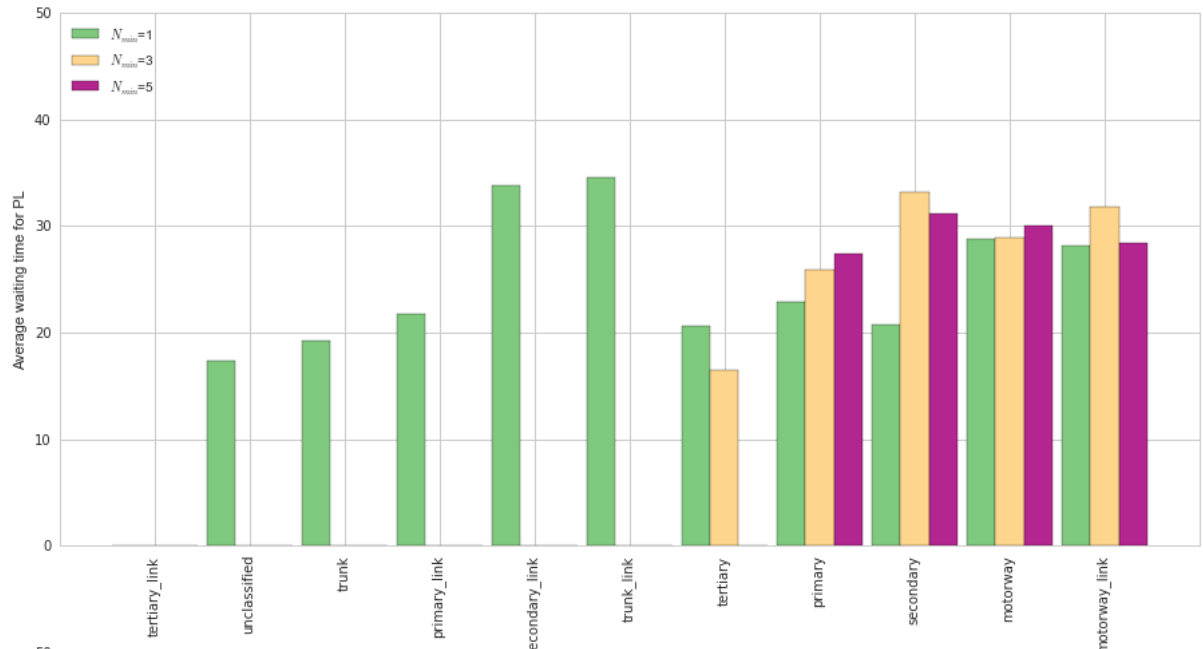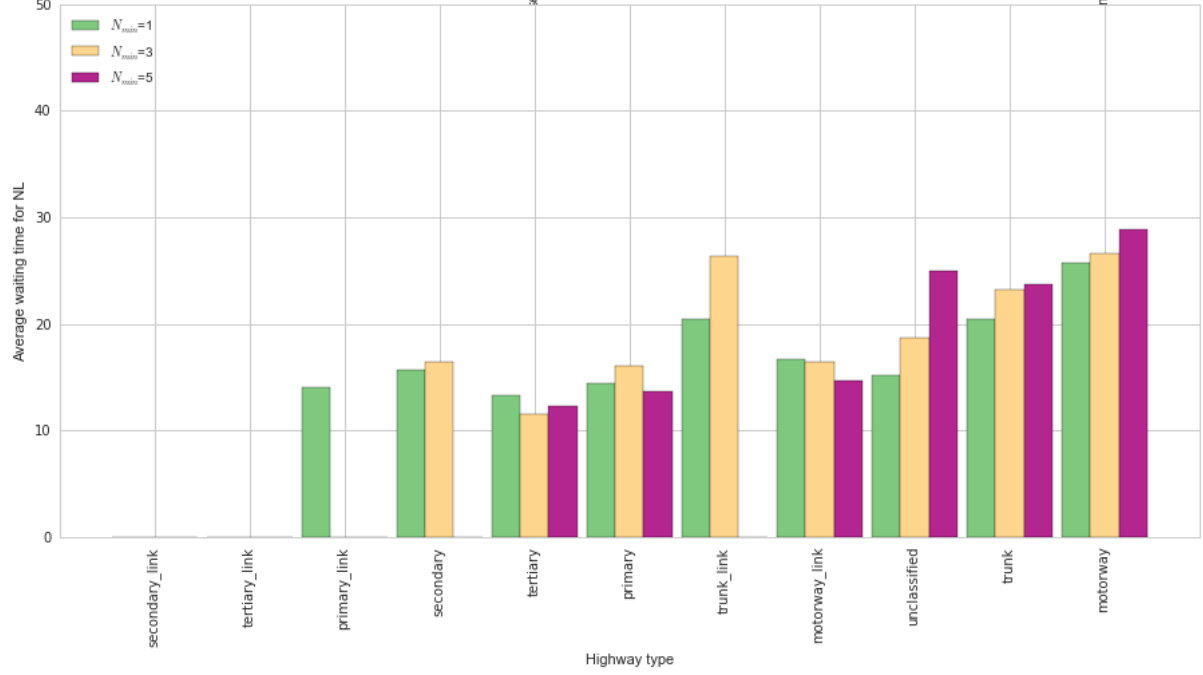

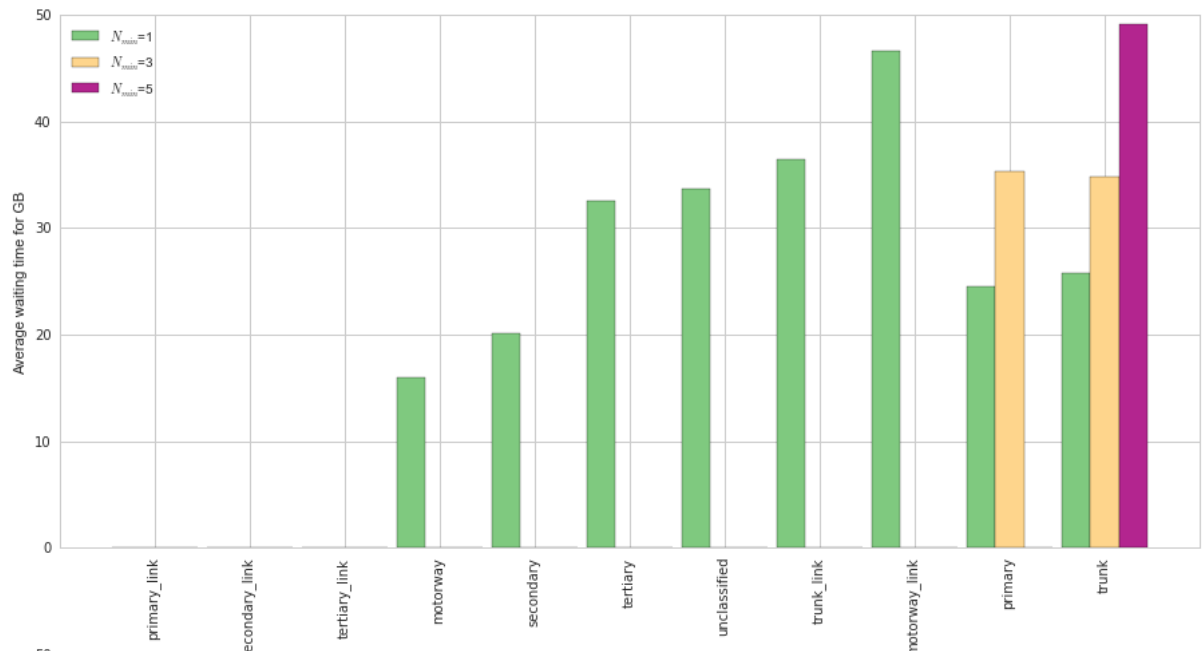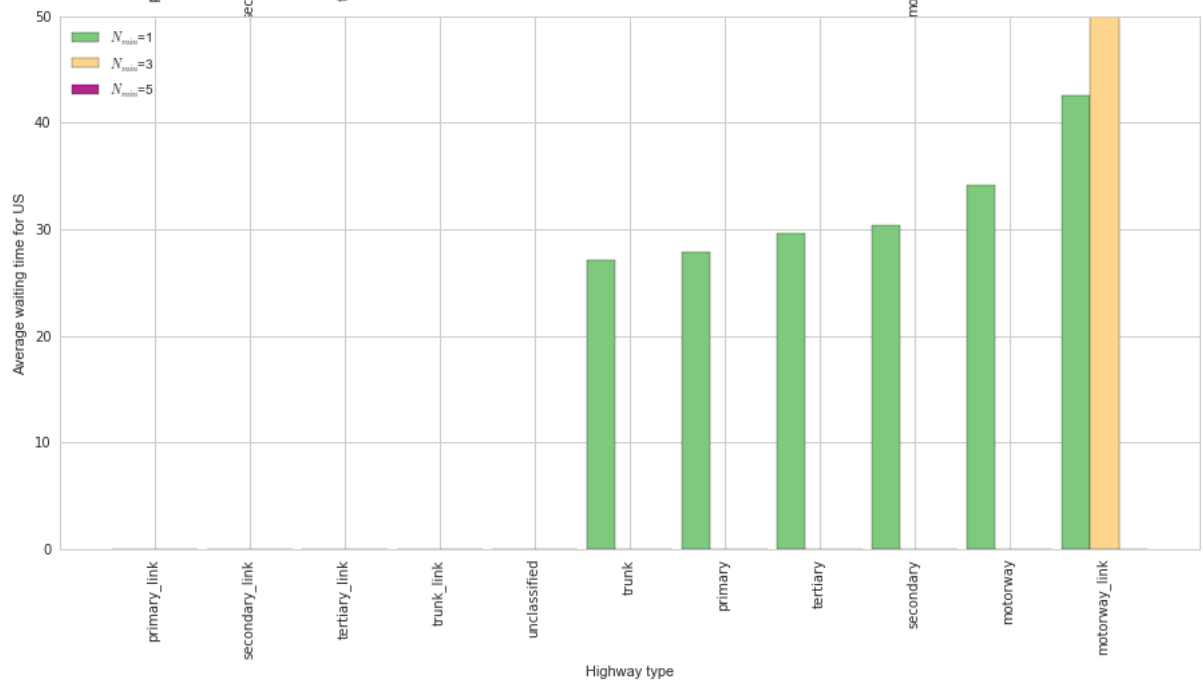

Highway type

## Average rating by type of road

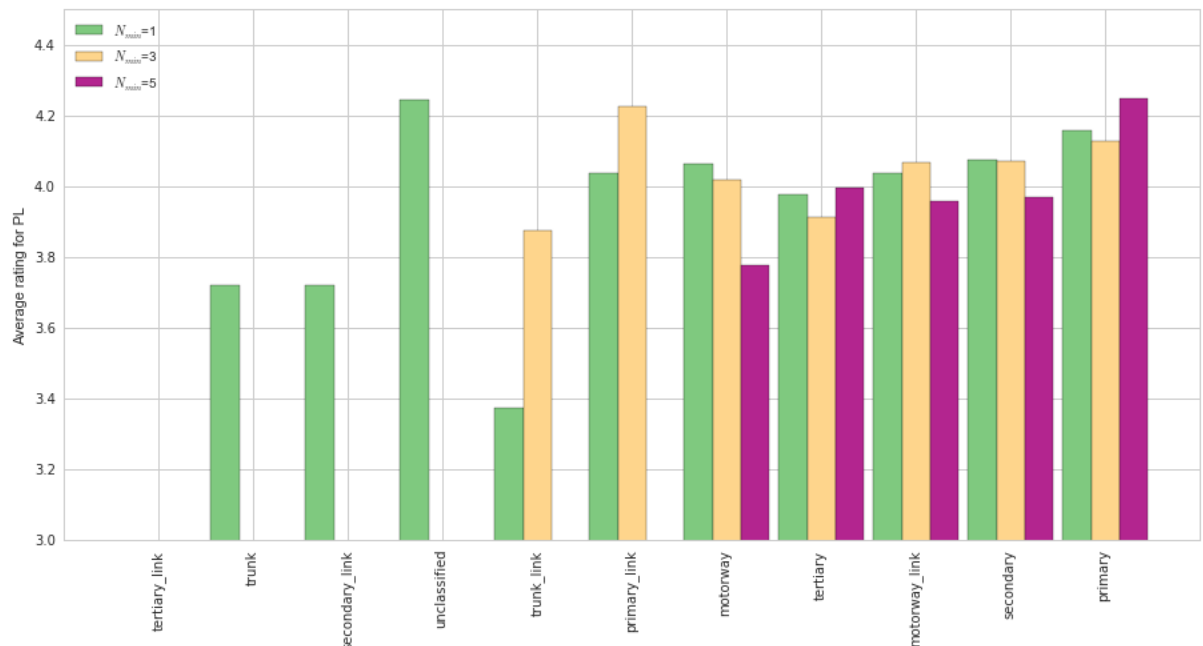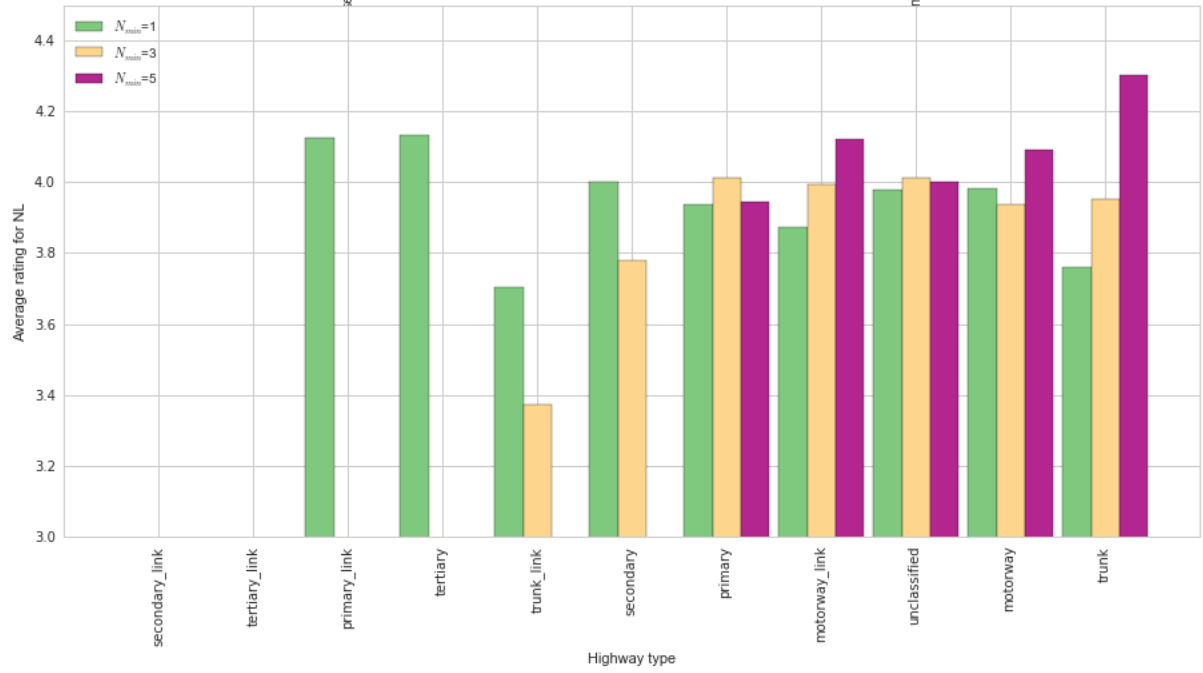

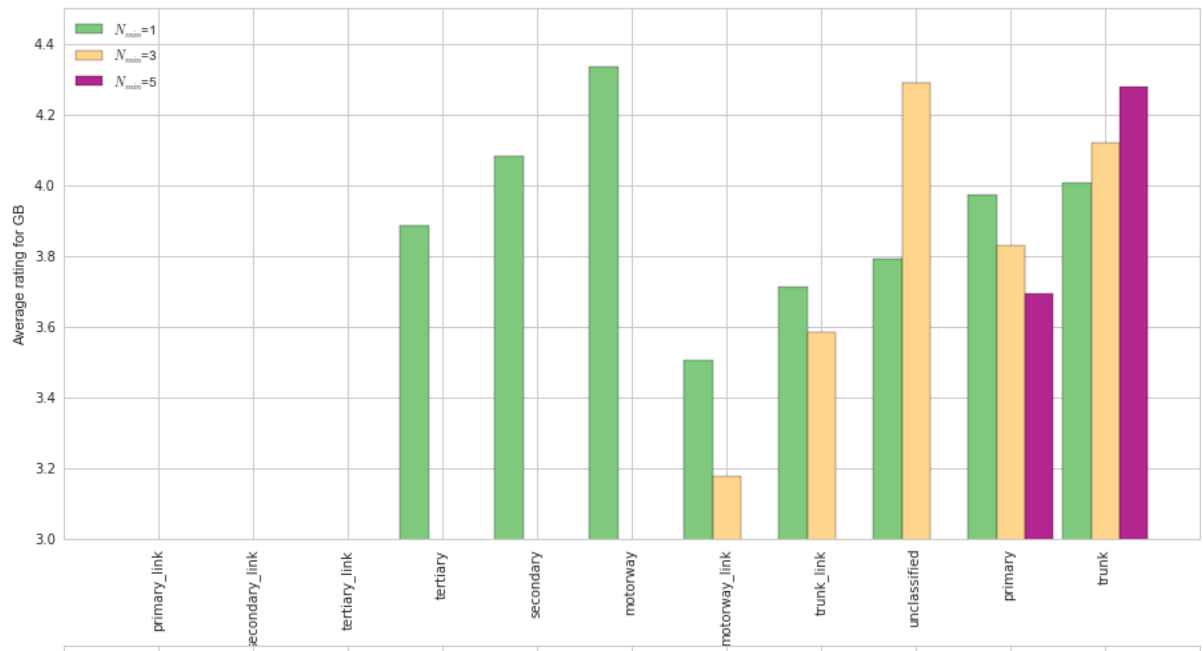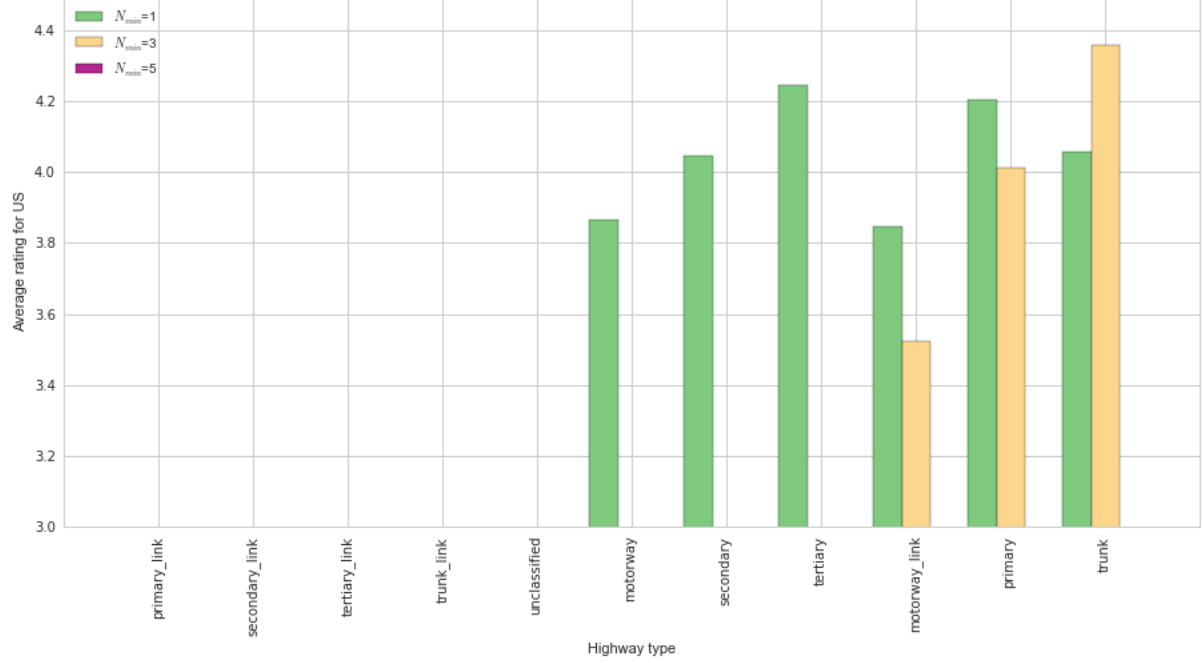

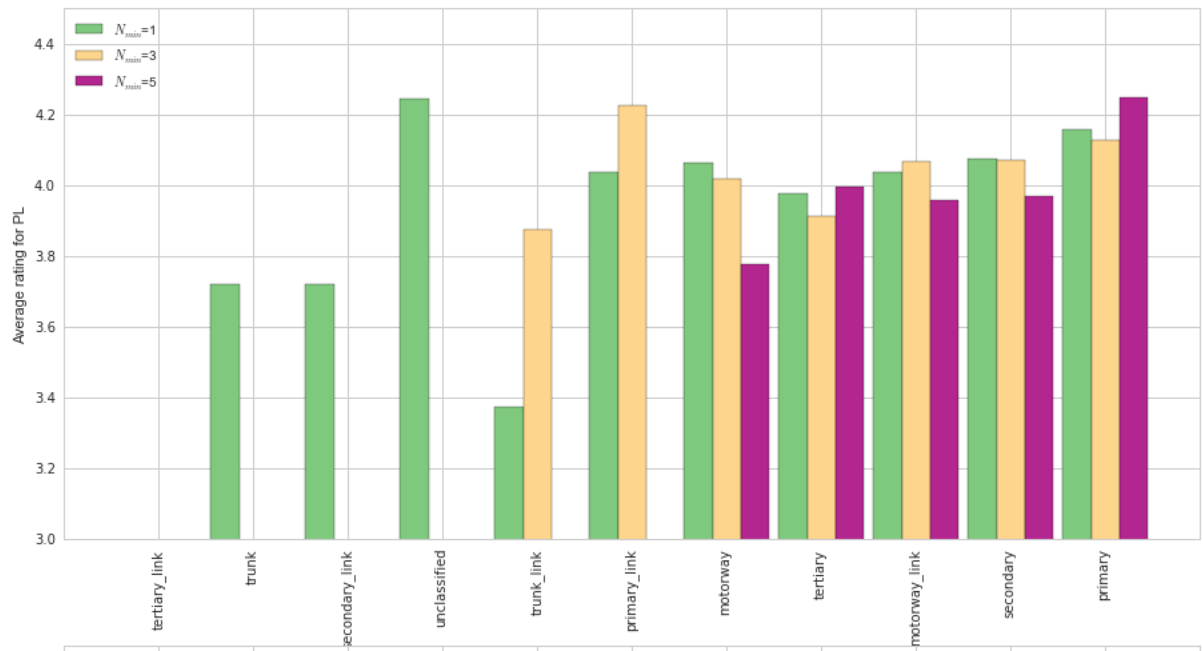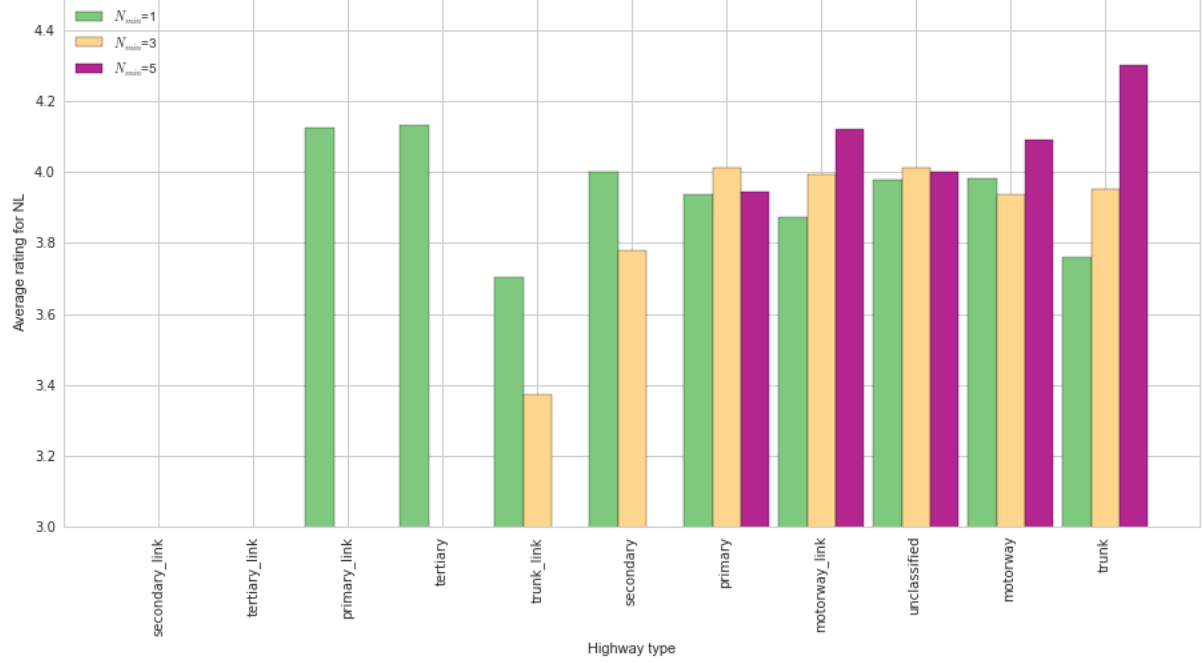

# Classifier accuracy

Classification accuracy for FR

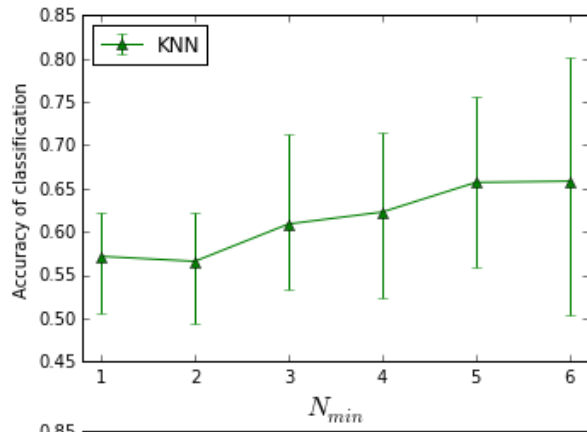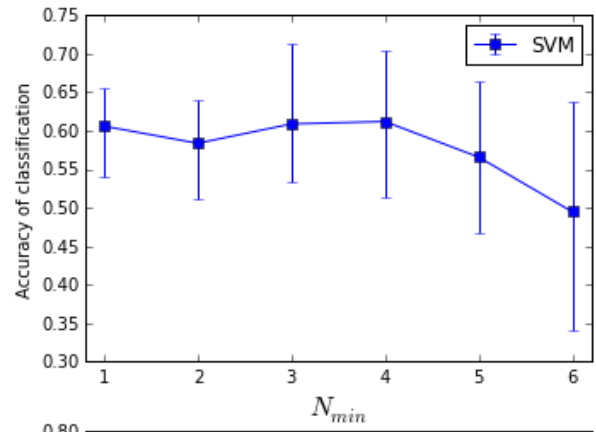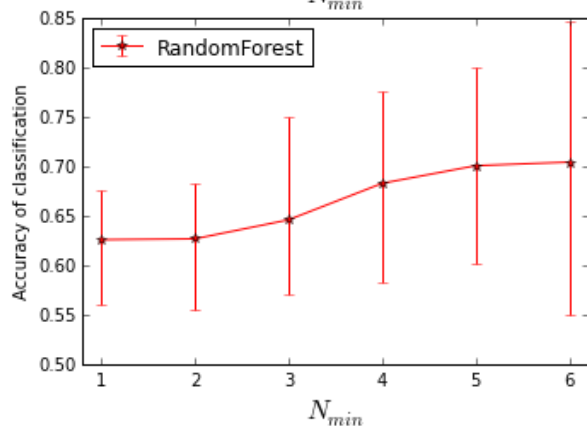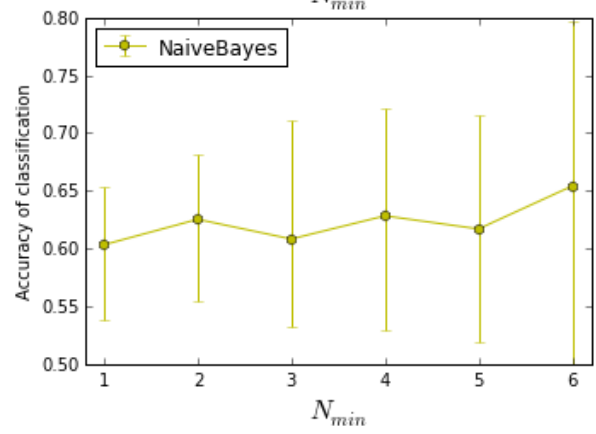

Classification accuracy for DE

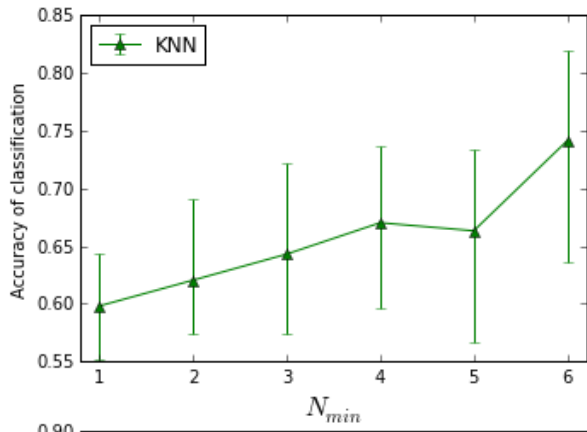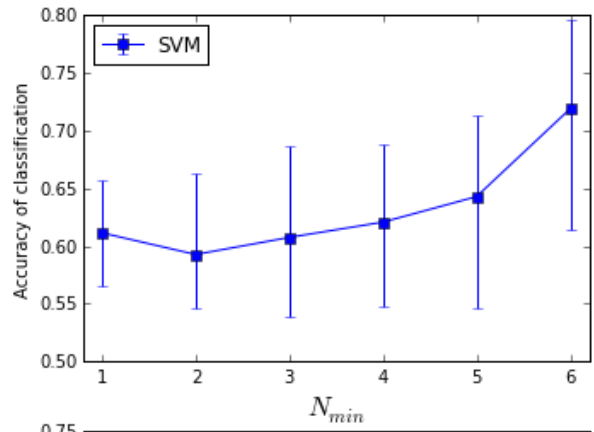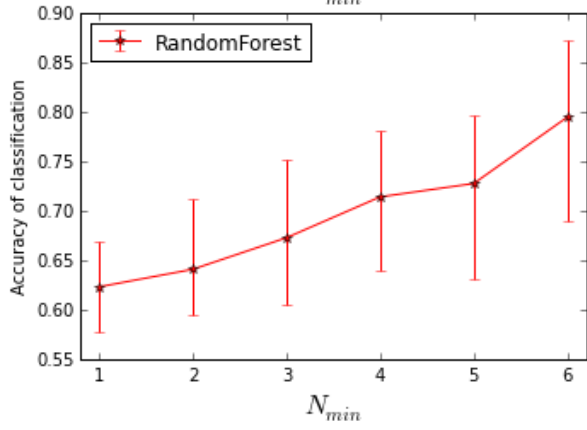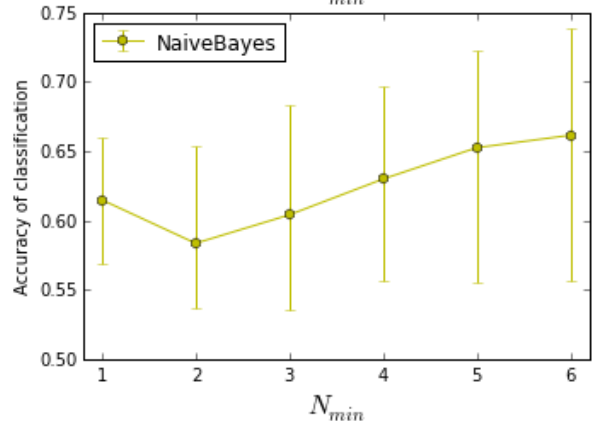

Classification accuracy for NL

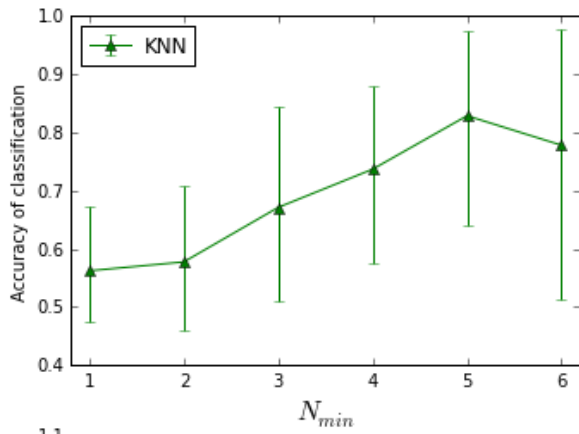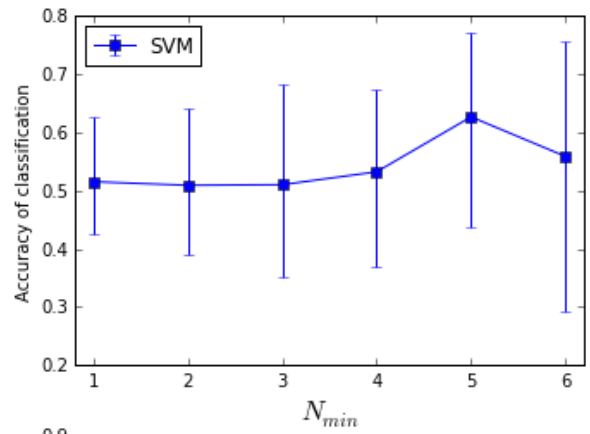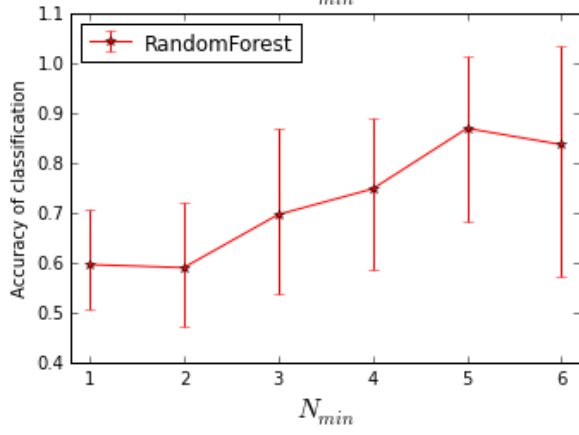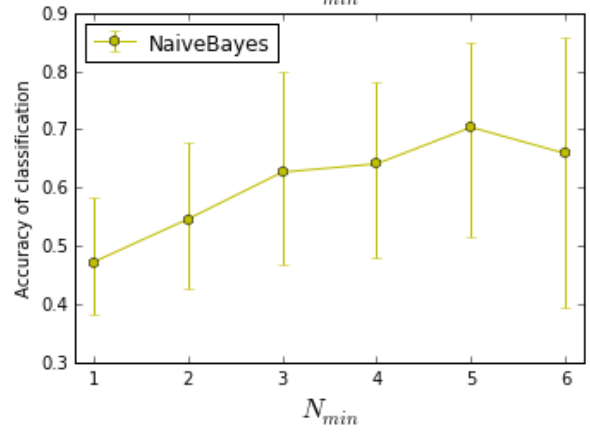



Classification accuracy for GB

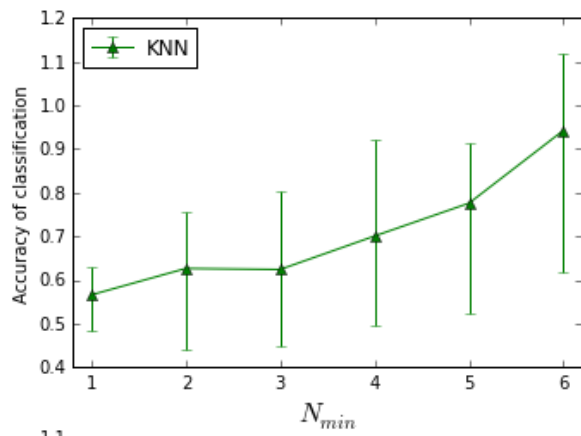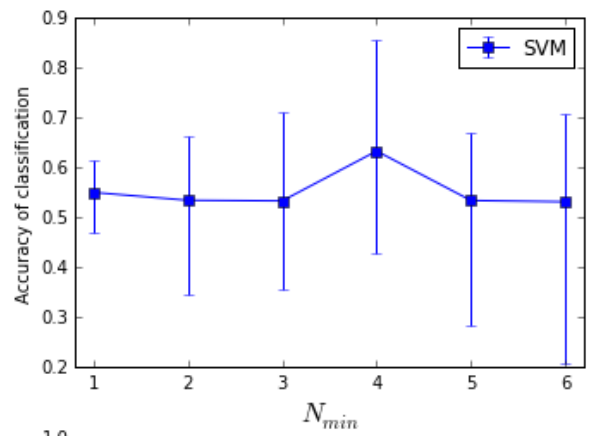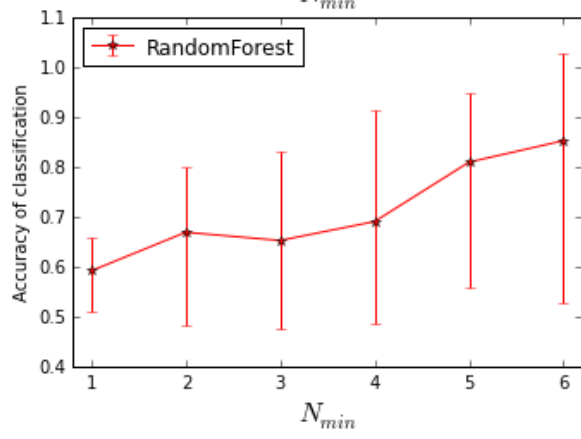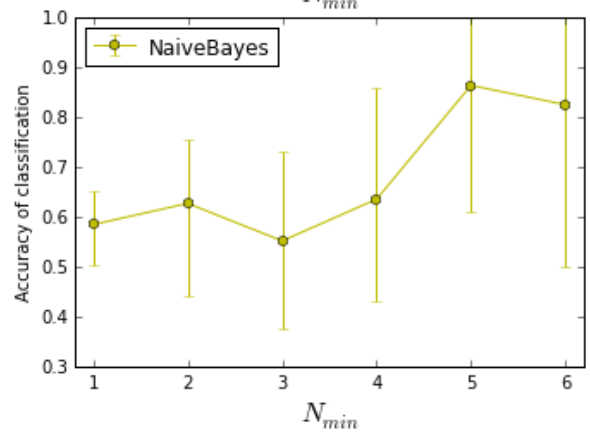

Classification accuracy for PL

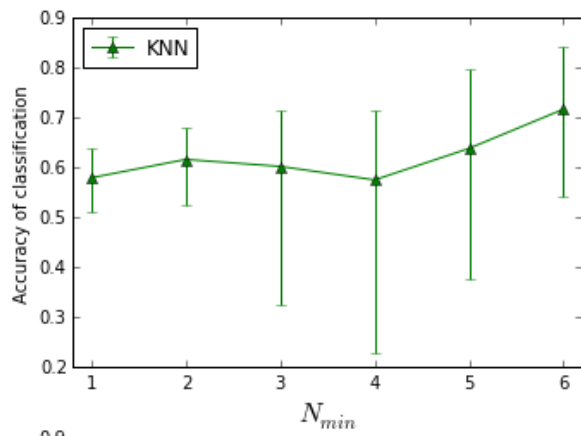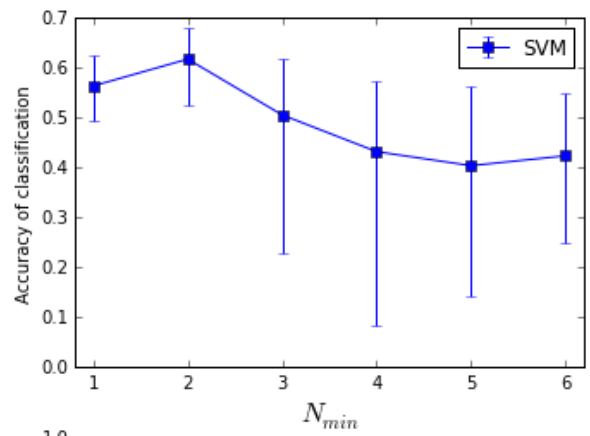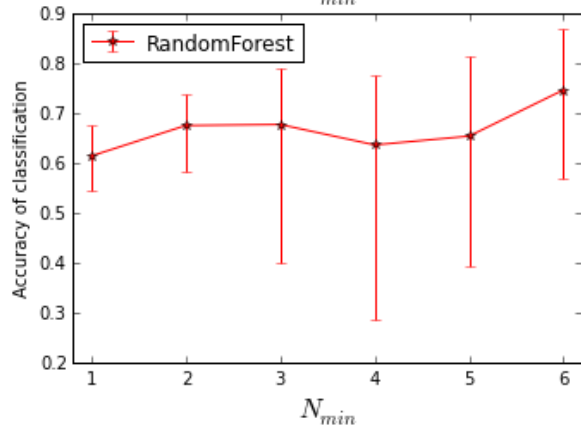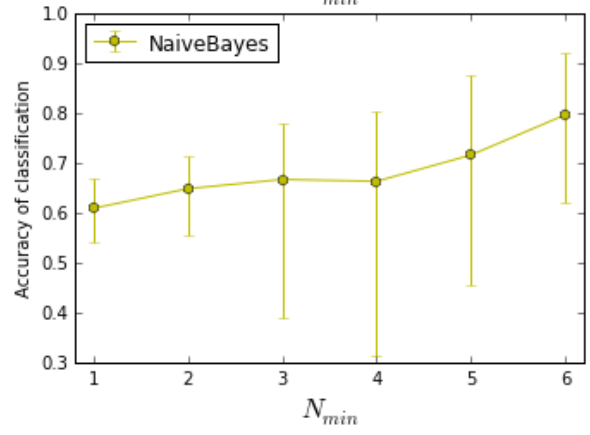

Supplement: MOESM1 [file 11942884]
